# Supplementary material for: Gut microbiome and dietary fibre intake strongly associate with IgG function and maturation following SARS-CoV-2 mRNA vaccination
Source: HighWire-hosted journal article supplement (doi:10.1136/gutjnl-2022-328556), 2022-12-22
Supplement: gutjnl-2022-328556supp003_data_supplement.pdf [file gutjnl-2022-328556supp003_data_supplement.pdf]

**Supplementary Table 1** Participant characteristics and sample collection information

| Variable                                                                          | BNT162b2 (n=52) |
|-----------------------------------------------------------------------------------|-----------------|
| Age, years (median [IQR])                                                         | 4 [32.3-54]     |
| Female [Male]                                                                     | 46 [6]          |
| Seropositivity to SARS-CoV-2 (Reactive [Non-reactive])                            | 2 [50]          |
| Blood sample collected post 1 <sup>st</sup> vaccine (Yes [No])                    | 47 [5]          |
| Blood sample collected post 2 <sup>nd</sup> vaccine (Yes [No])                    | 18 [34]         |
| Baseline stool samples collected (Yes [No])                                       | 48 [4]          |
| Twelve-weeks post 1 <sup>st</sup> vaccine stool samples collected (Yes [No])      | 41 [11]         |
| Matching baseline and twelve-week stool samples collected (Yes [No])              | 38 [14]         |
| Dietary fibre grouping (Low [Moderate] High) (n=41)                               | 13 [14] 14      |
| Total dietary fibre intake, g/day (mean [SD]) (n=41)                              | 24.7 [11.9]     |
| Vegetarian (Yes [No]) (n=41)                                                      | 4 [37]          |
| Antibiotics taken within 9 months of collecting stool (Yes [No]) (n=41)           | 3 [38]          |
| Significant* change in weight or food intake over the past year (Yes [No]) (n=41) | 7 [34]          |

IQR – inter quartile range, SD – standard deviation. \* Significant body weight changes >10% weight gain or loss and significant changes in food intake included becoming vegetarian/vegan, stopped consuming gluten, dairy or sugar, increased fruit, or vegetable intake, etc.

**Supplementary Table 2** Gut microbiota species significantly positively or negatively associated ( $p < 0.01$ ; statistical test) with higher avidity after the 2nd dose of the BNT162b2 vaccine (D2) in a subset of participants ( $n=15$ )

|                | baseMean         | log2FoldChange | lfcSE       | stat         | pvalue               | padj                 | Kingdom  | Phylum           | Class            | Order                          | Family              | Genus                 | Species        |
|----------------|------------------|----------------|-------------|--------------|----------------------|----------------------|----------|------------------|------------------|--------------------------------|---------------------|-----------------------|----------------|
| <b>ASV_12</b>  | 652.6828066      | 16.61603655    | 1.12976698  | 14.70748999  | 5.77085204873443E-49 | 4.0395964341141E-47  | Bacteria | Firmicutes       | Negativicutes    | Acidaminococcales              | Acidaminococcaceae  | Phascolarctobacterium | succinatutens  |
| <b>ASV_40</b>  | 856.3116714      | 15.01679959    | 1.12976278  | 13.29199355  | 2.57621721167962E-40 | 1.20223469878382E-38 | Bacteria | Synergistota     | Synergistia      | Synergistales                  | Synergistaceae      | Cloacibacillus        | evryensis      |
| <b>ASV_56</b>  | 1163.66926110663 | 18.9073311     | 1.129781224 | 16.73539151  | 7.23796558640599E-63 | 1.01331518209684E-60 | Bacteria | Firmicutes       | Negativicutes    | Veillonellales-Selenomonadales | Selenomonadaceae    | Megamonas             | funiformis     |
| <b>ASV_90</b>  | 299.9462157      | -11.55809526   | 1.09781944  | -10.52822972 | 6.40272464578869E-26 | 1.12047681301302E-24 | Bacteria | Firmicutes       | Negativicutes    | Acidaminococcales              | Acidaminococcaceae  | Acidaminococcus       | intestinalis   |
| <b>ASV_104</b> | 165.2171921      | -7.257755983   | 1.094064509 | -6.633755071 | 3.27252692455385E-11 | 3.81794807864615E-10 | Bacteria | Bacteroidota     | Bacteroidia      | Bacteroidales                  | Bacteroidaceae      | Bacteroides           | massiliensis   |
| <b>ASV_123</b> | 100.8114371      | -5.521510801   | 1.091821644 | -5.057154555 | 4.25558338438288E-07 | 4.58293595241233E-06 | Bacteria | Actinobacteriota | Actinobacteria   | Bifidobacteriales              | Bifidobacteriaceae  | Bifidobacterium       | bifidum        |
| <b>ASV_177</b> | 53.6415468       | 4.110286262    | 1.128616539 | 3.641880232  | 0.000270654          | 0.00270654           | Bacteria | Actinobacteriota | Actinobacteria   | Bifidobacteriales              | Bifidobacteriaceae  | Bifidobacterium       | animalis       |
| <b>ASV_202</b> | 127.887441       | 14.00883584    | 1.12979702  | 12.39942714  | 2.63198463344399E-35 | 9.21194621705396E-34 | Bacteria | Bacteroidota     | Bacteroidia      | Bacteroidales                  | Bacteroidaceae      | Bacteroides           | plebeius       |
| <b>ASV_217</b> | 45.77577167      | 12.5267809     | 1.129873892 | 11.08688411  | 1.45259641590064E-28 | 3.38939163710149E-27 | Bacteria | Bacteroidota     | Bacteroidia      | Bacteroidales                  | Tannerellaceae      | Parabacteroides       | johnsonii      |
| <b>ASV_309</b> | 60.52674668      | 12.85841755    | 1.129833358 | 11.38080891  | 5.21140863375641E-30 | 1.45919441745179E-28 | Bacteria | Desulfobacterota | Desulfovibrionia | Desulfovibrionales             | Desulfovibrionaceae | Desulfovibrio         | fairfieldensis |
| <b>ASV_328</b> | 27.36761572      | 11.33415571    | 1.123464443 | 10.08857537  | 6.20636856209842E-24 | 9.65435109659754E-23 | Bacteria | Bacteroidota     | Bacteroidia      | Bacteroidales                  | Bacteroidaceae      | Bacteroides           | ovatus         |
| <b>ASV_384</b> | 36.43927284      | 12.11973529    | 1.129888243 | 10.72649031  | 7.64447009656451E-27 | 1.5288940193129E-25  | Bacteria | Firmicutes       | Clostridia       | Lachnospirales                 | Lachnospiraceae     | Eisenbergiella        | tayi           |
| <b>ASV_635</b> | 21.05201209      | 11.23206477    | 1.138659715 | 9.864285715  | 5.9456105183706E-23  | 8.32385472571884E-22 | Bacteria | Firmicutes       | Clostridia       | Oscillospirales                | Ruminococcaceae     | Negativibacillus      | massiliensis   |

**Supplementary Table 3** Equations used to calculate absolute (U/mL) and relative fractional avidity (%), and total absolute and relative fractional avidity indices

|                                           | Very low                                                                                                   | Low                                       | Medium                                      | High                                      | Very high                                   |
|-------------------------------------------|------------------------------------------------------------------------------------------------------------|-------------------------------------------|---------------------------------------------|-------------------------------------------|---------------------------------------------|
| Absolute fractional avidity (U/mL)        | $AFA_{vlo} = Y_0 - Y_{0.5}$                                                                                | $AFA_{lo} = Y_{0.5} - Y_{0.75}$           | $AFA_{med} = Y_{0.75} - Y_1$                | $AFA_{hi} = Y_1 - Y_2$                    | $AFA_{vhi} = Y_2$                           |
| Total absolute fractional avidity index   | $2 * AFA_{vhi} + 1 * AFA_{hi} + 0.25 * AFA_{med} + 0.25 * AFA_{lo} + 0.5 * AFA_{vlo}$                      |                                           |                                             |                                           |                                             |
| Relative fractional avidity (%)           | $RFA_{vlo} = \frac{AFA_{vlo}}{Y_0} * 100\%$                                                                | $RFA_{lo} = \frac{AFA_{lo}}{Y_0} * 100\%$ | $RFA_{med} = \frac{AFA_{med}}{Y_0} * 100\%$ | $RFA_{hi} = \frac{AFA_{hi}}{Y_0} * 100\%$ | $RFA_{vhi} = \frac{AFA_{vhi}}{Y_0} * 100\%$ |
| Total relative fractional avidity (TRFA)* | $TRFA = -0.533 * RFA_{vlo} + 0.0269 * RFA_{lo} + 0.477 * RFA_{med} + 0.492 * RFA_{hi} + 0.495 * RFA_{vhi}$ |                                           |                                             |                                           |                                             |

AFA – absolute fractional avidity, RFA – relative fractional avidity

\*Based on eigenvalue plot loadings of each avidity for PC1 of all avidity data
