# Supplementary figures and images for: Gut microbiome and dietary fibre intake strongly associate with IgG function and maturation following SARS-CoV-2 mRNA vaccination
Source: HighWire-hosted journal article supplement (doi:10.1136/gutjnl-2022-328556), 2022-12-22

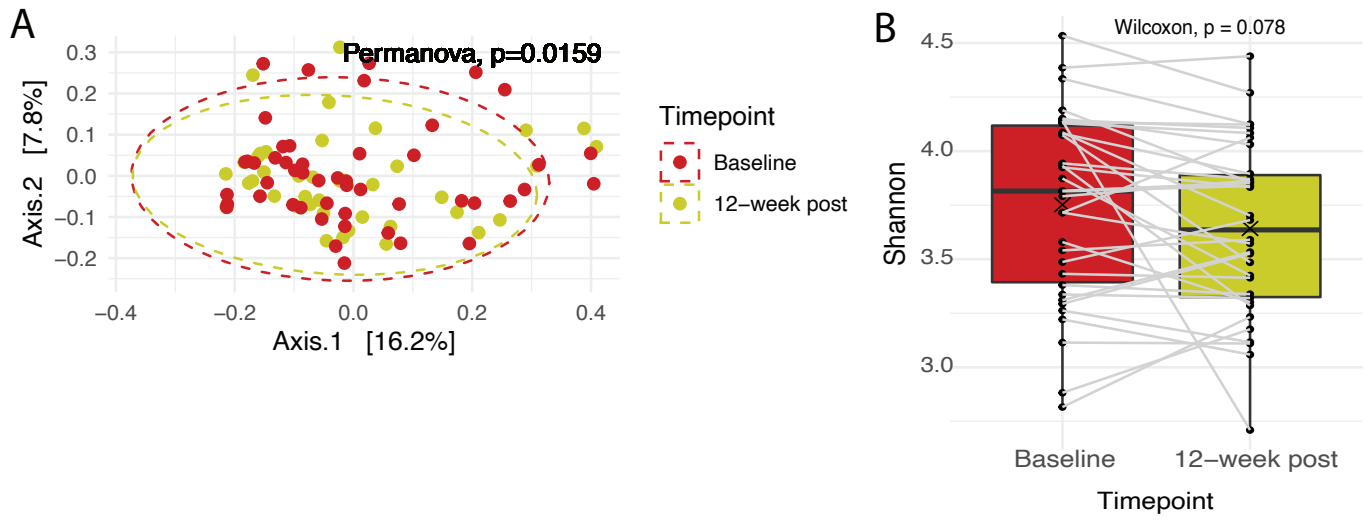

Supplement: gutjnl-2022-328556supp001_data_supplement.pdf [file gutjnl-2022-328556supp001_data_supplement.pdf]



Supplement: gutjnl-2022-328556supp001_data_supplement.pdf [file gutjnl-2022-328556supp001_data_supplement.pdf]
